# Supplementary material for: Biomimetic Precapillary Flow Patterns for Enhancing Blood Plasma Separation: A Preliminary Study
Source: Sensors (Basel). 2016 Sep 21;16(9):1543. doi: 10.3390/s16091543 (PMC5038815; doi:10.3390/s16091543)
Supplement: Supplementary file 1 [file sensors-16-01543-s001.pdf]

# Supplementary Materials: Biomimetic Precapillary Flow Patterns for Enhancing Blood Plasma Separation: A Preliminary Study

Bumseok Namgung, Justin Kok Soon Tan, Peter Agustinus Wong, Sung-Yong Park, Hwa Liang Leo and Sangho Kim

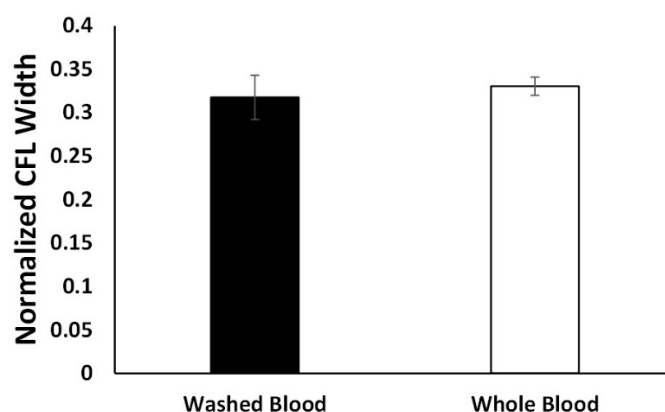

**Figure S1.** Comparison between the use of washed RBCs re-suspended in PBS and whole blood on the separation performance. Both samples were matched to 47.5% hematocrit. Statistical testing revealed no significant difference between the normalized CFL widths for both samples ( $P > 0.05$ ).

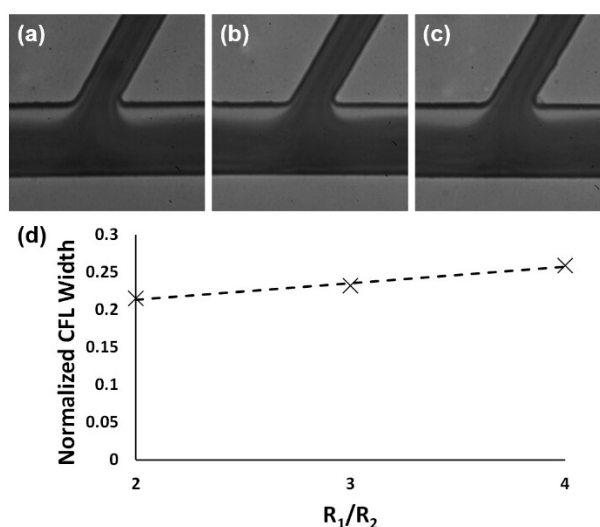

**Figure S2.** Typical examples for plasma separation from 40% hematocrit blood samples with the flow resistance differences of  $R_1/R_2 = 2$  (a);  $R_1/R_2 = 3$  (b) and  $R_1/R_2 = 4$  (c); (d) Plot of normalized CFL width against  $R_1/R_2$ . The normalized CFL width increased linearly with  $R_1/R_2$  due to increased flow biasing towards channel 2.
